# Supplementary material
Source: PubMed Central journal article supplement (PMC3072847)
Supplement: NIHMS279128-supplement-1_si_001.pdf [file NIHMS279128-supplement-1_si_001.pdf]

Supporting Online Material

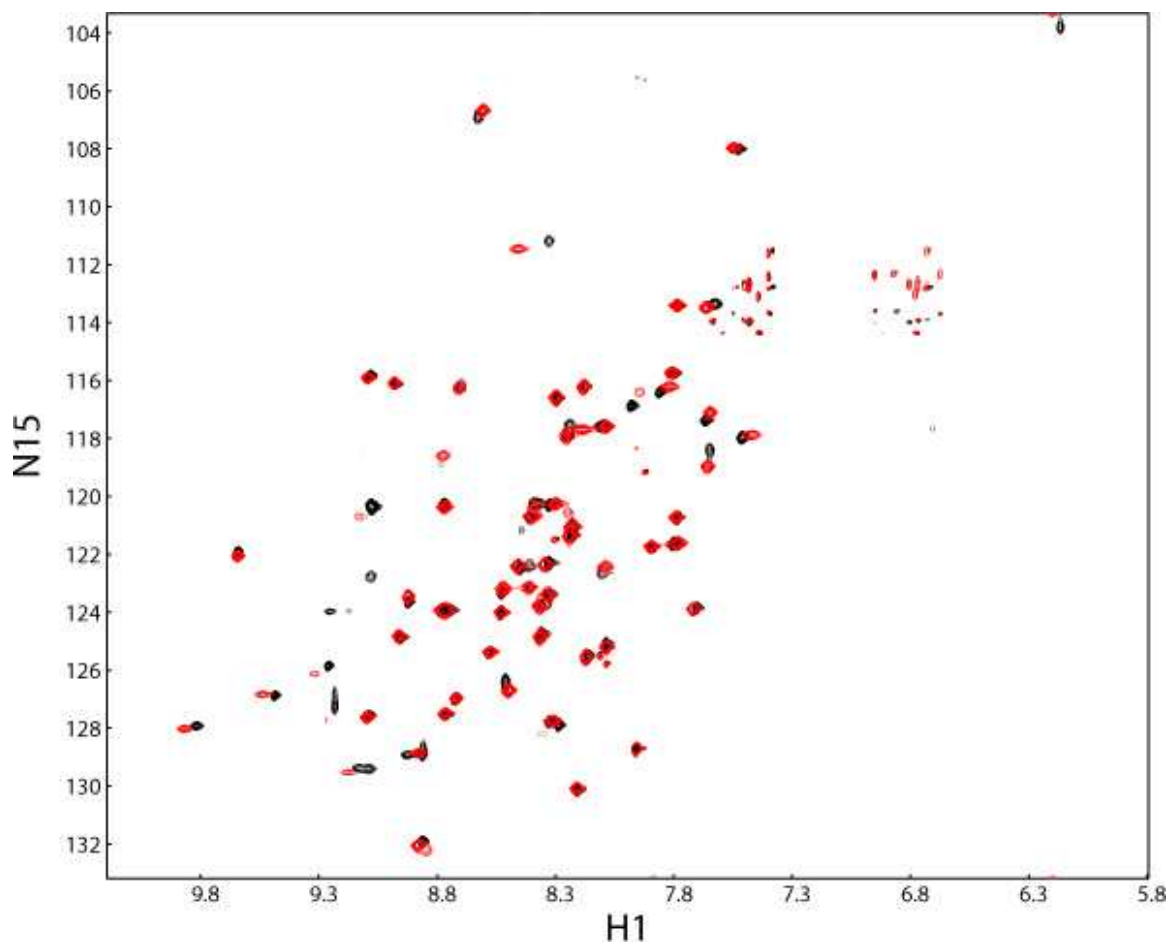

**Supplementary Figure 1a:** Overlay of NMR  $^1\text{H}$ - $^{15}\text{N}$  correlation (HSQC) spectra of Ag(I)- $^{15}\text{N}$ -CusF (black) and Ag(I)- $^{15}\text{N}$ -CusF mixed 1:1 with unlabeled apo-CusB (red).

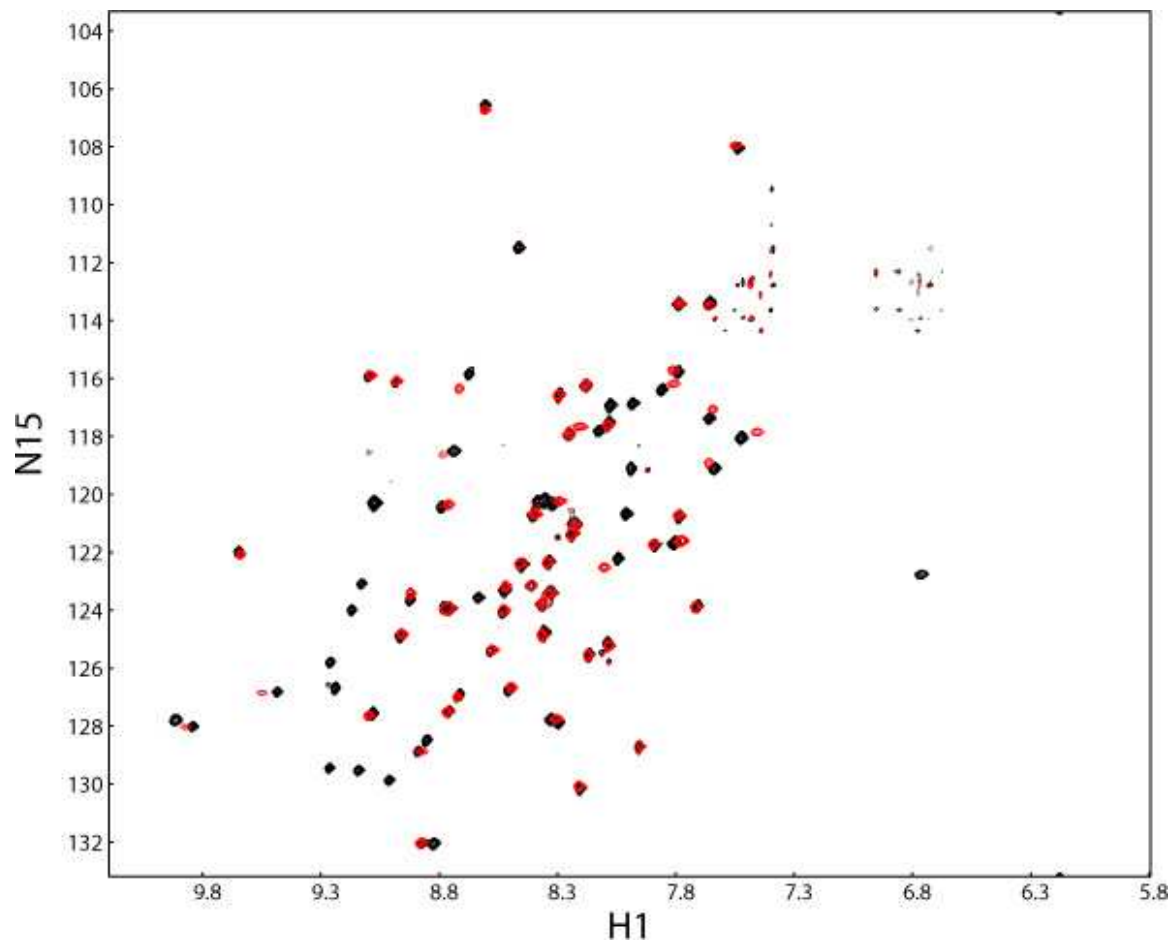

**Supplementary Figure 1b:** Overlay of NMR  $^1\text{H}$ - $^{15}\text{N}$  correlation (HSQC) spectra of apo- $^{15}\text{N}$ -CusF (black) and apo- $^{15}\text{N}$ -CusF mixed 1:1 with unlabeled Ag(I)-CusB (red).

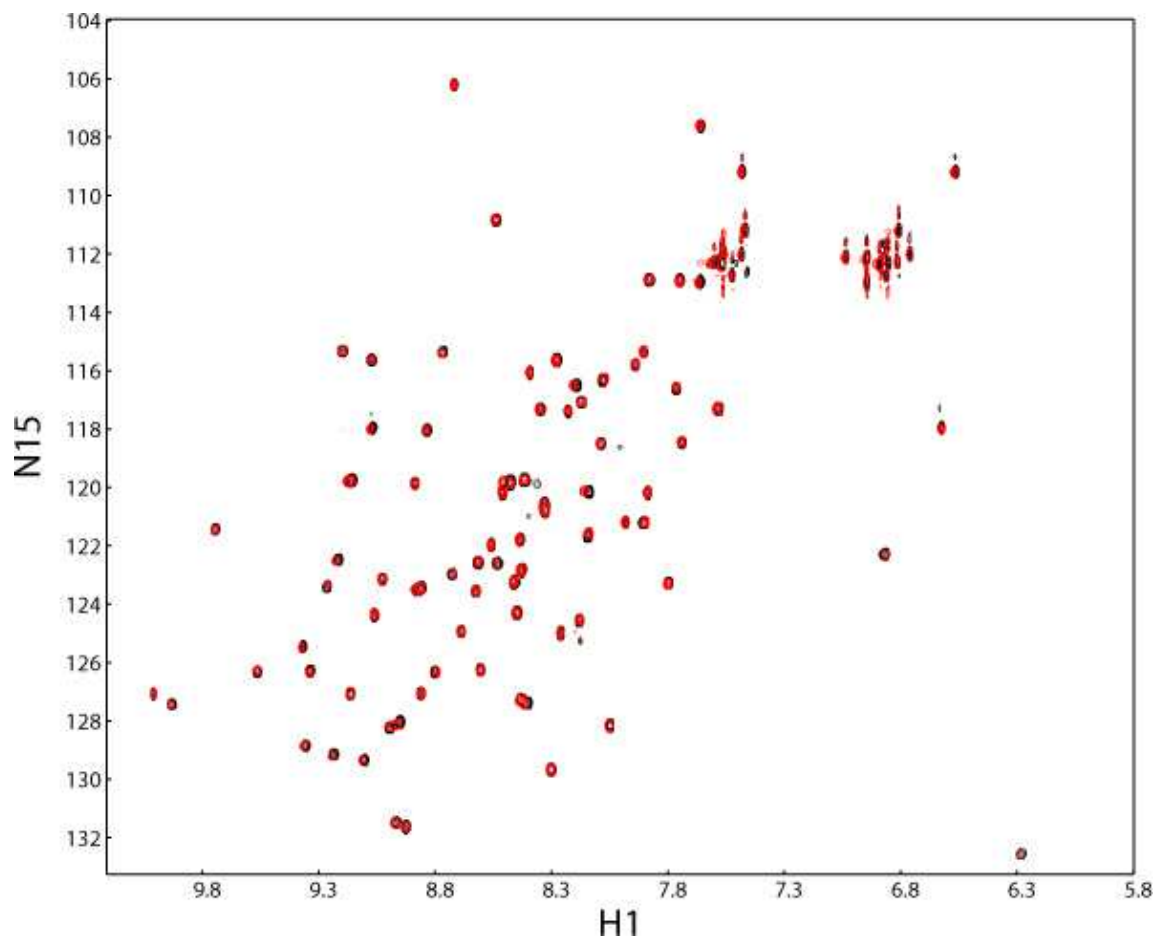

**Supplementary Figure 1c:** Overlay of NMR  $^1\text{H}$ - $^{15}\text{N}$  correlation (HSQC) spectra of apo- $^{15}\text{N}$ -CusF (black) and apo- $^{15}\text{N}$ -CusF mixed 1:1 with unlabeled apo-CusB (red).

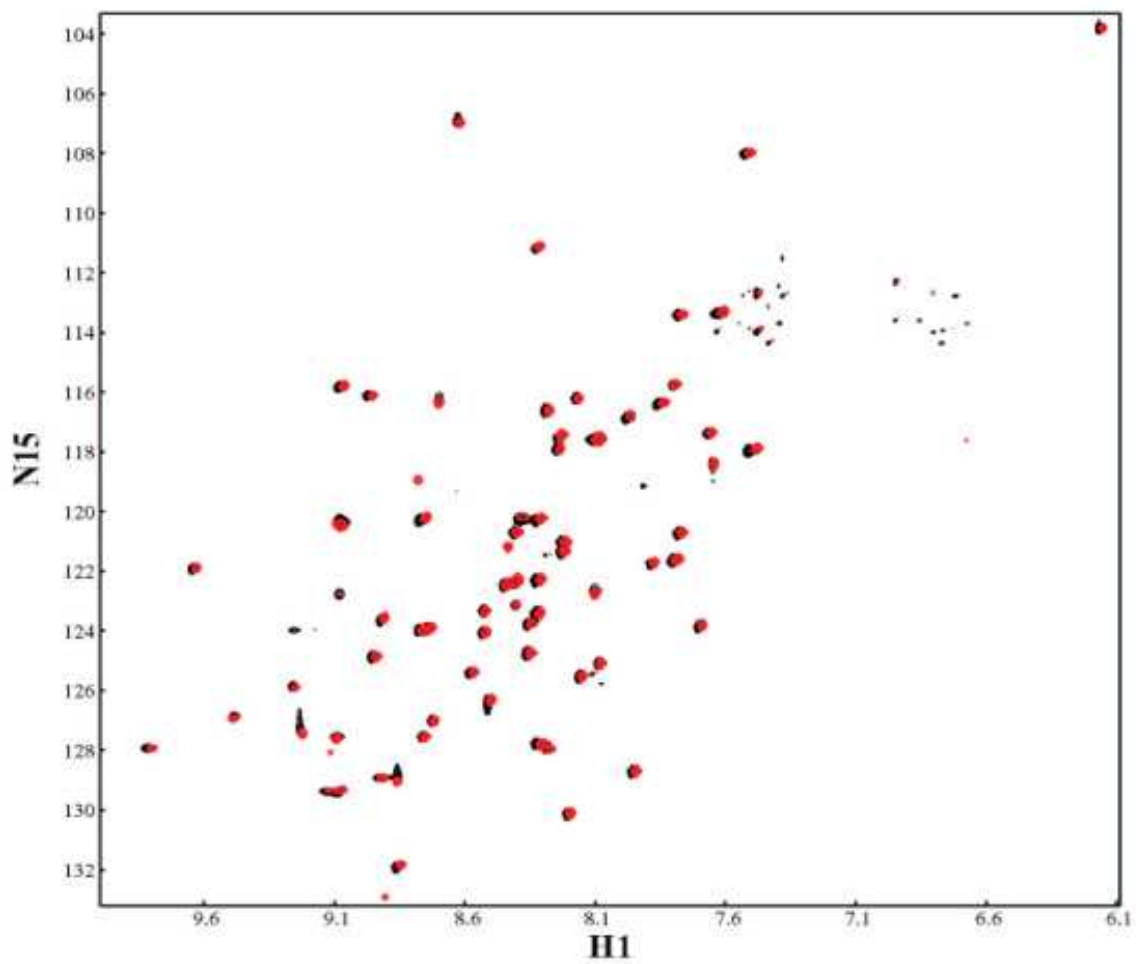

**Supplementary Figure 1d:** Overlay of NMR  $^1\text{H}$ - $^{15}\text{N}$  correlation (HSQC) spectra of Ag(I)- $^2\text{H}/^{15}\text{N}/^{13}\text{C}$ -CusF (black) and Ag(I)- $^2\text{H}/^{15}\text{N}/^{13}\text{C}$ -CusF mixed 1:1 with unlabeled Ag(I)-CusB (red).

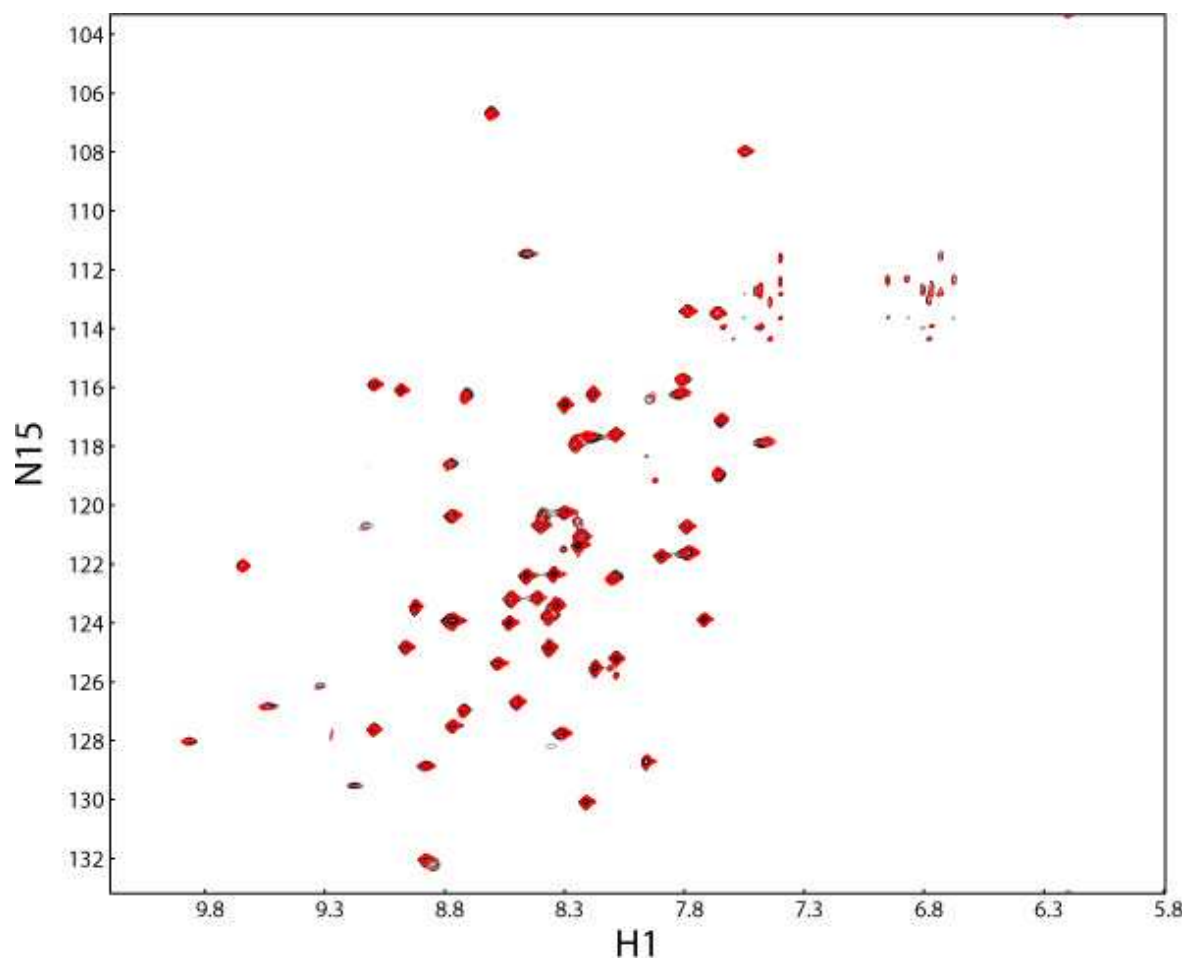

**Supplementary Figure 1e:** Overlay of NMR  $^1\text{H}$ - $^{15}\text{N}$  correlation (HSQC) spectra of apo- $^2\text{H}/^{15}\text{N}/^{13}\text{C}$ -CusF mixed 1:1 with unlabeled Ag(I)-CusB (black) and Ag(I)- $^2\text{H}/^{15}\text{N}/^{13}\text{C}$ -CusF mixed 1:1 with unlabeled apo-CusB (red).

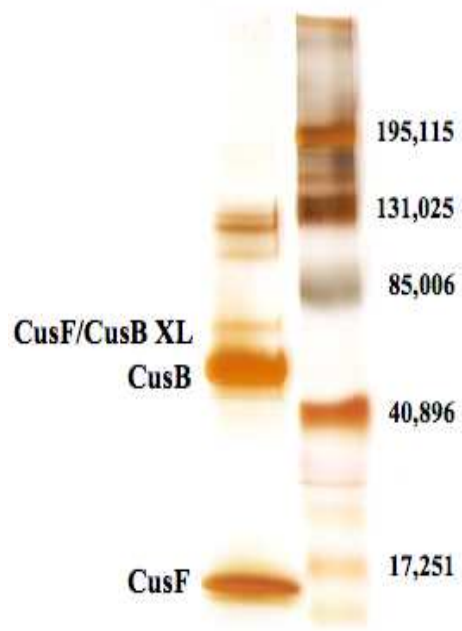

**Supplementary Figure 2:** Silver-stained SDS-PAGE gel of cross-linking experiment shows bands for CusF, CusB and CusF/CusB cross-linked (XL) product. The higher molecular weight band was not analyzed, but is likely to be CusB/CusB cross-linked product.

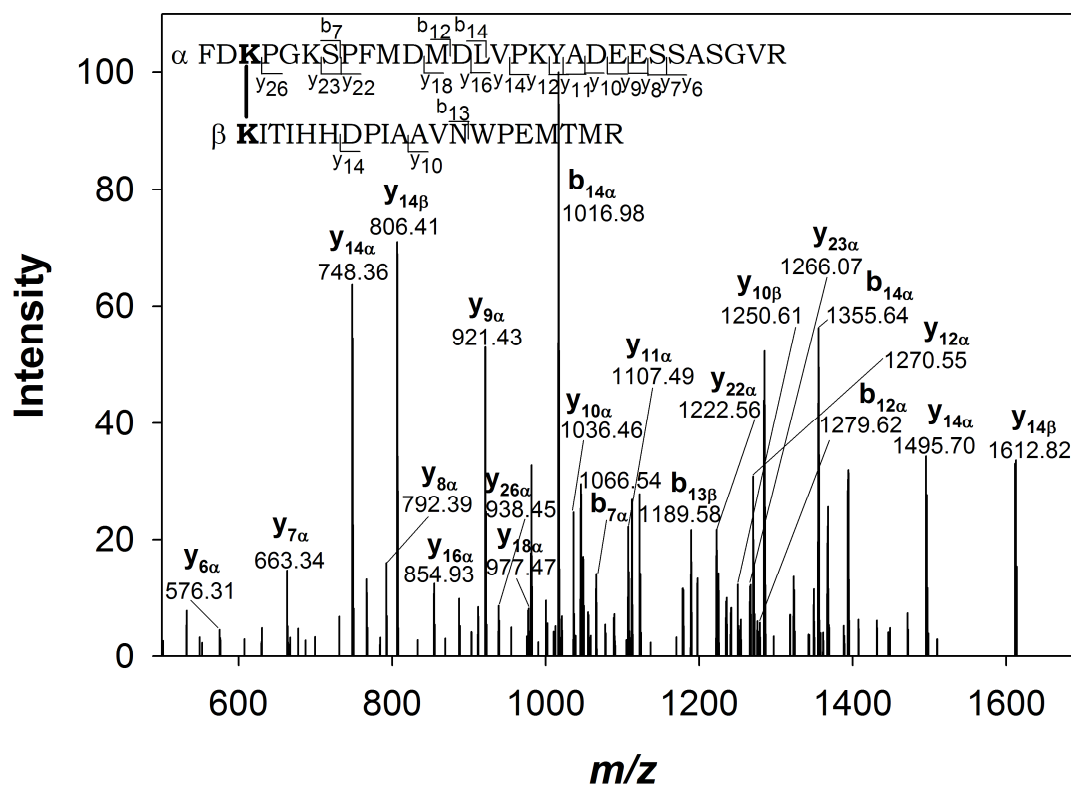

**Supplementary Figure 3:** Tandem MS spectrum of cross-linked product with precursor ion  $m/z$  1135.55. The cross-link includes CusF<sub>31-50</sub> with cross-link at K31 and CusB<sub>27-55</sub> with cross-link at K29. Fragment ions are labeled in the spectrum and fragmentation is displayed within the peptide sequence.

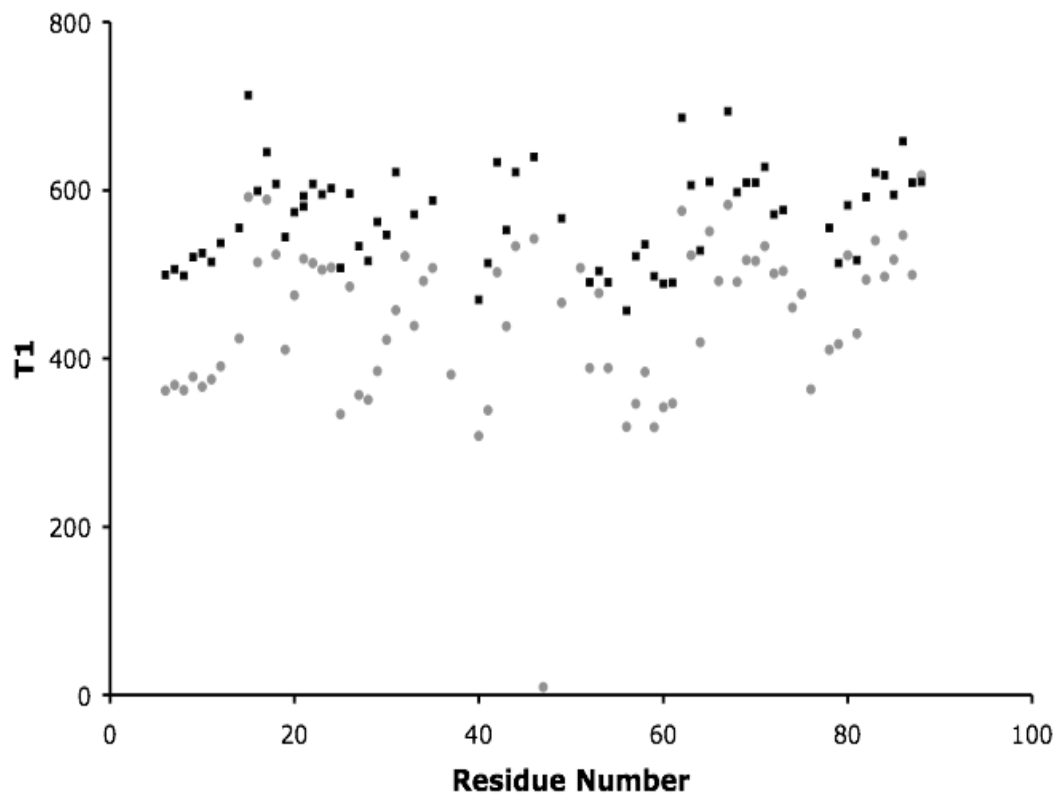

**Supplementary Figure 4:** Plot of CusF residue number and corresponding  $T_1$  value for Ag(I)-<sup>15</sup>N-CusF (gray circles) and <sup>15</sup>N-CusF/CusB/Ag(I) (black squares).



**Supplementary Online Table 1: Resonance assignments determined from analysis of HNCA spectra for Ag(I)-<sup>2</sup>H/<sup>15</sup>N/<sup>13</sup>C-CusF mixed 1:1 with unlabeled apo-CusB.**

| <u>Residue</u> | <u><math>\delta_{\text{NH}}</math></u> | <u><math>\delta_{\text{N}}</math></u> | <u><math>\delta_{\text{C}\alpha^i}</math></u> |
|----------------|----------------------------------------|---------------------------------------|-----------------------------------------------|
| 6E             | 8.49275                                | 122.5018                              | 56.47457                                      |
| 7T             | 8.26277                                | 115.4705                              | 61.74765                                      |
| 8M             | 8.4478                                 | 122.9705                              | 55.5168                                       |
| 9S             | 8.33686                                | 116.8767                              | 58.36967                                      |
| 10E            | 8.41608                                | 122.5018                              | 56.27221                                      |
| 11A            | 8.25474                                | 124.3768                              | 52.46899                                      |
| 12Q            | 8.32442                                | 120.6268                              | 53.44429                                      |
| 13P            |                                        |                                       | 62.588                                        |
| 14Q            | 8.42738                                | 121.0955                              | 55.27034                                      |
| 15V            | 8.16498                                | 124.3768                              | 62.07455                                      |
| 16I            | 8.96183                                | 131.4081                              | 59.79852                                      |
| 17S            | 7.86479                                | 120.6268                              | 56.7041                                       |
| 18A            | 8.5789                                 | 125.7831                              | 51.26845                                      |
| 19T            | 8.53867                                | 110.7829                              | 59.5325                                       |
| 20G            | 8.6903                                 | 105.6266                              | 46.63033                                      |
| 21V            | 8.3804                                 | 119.2205                              | 59.81185                                      |
| 22V            | 8.84888                                | 126.7206                              | 63.88682                                      |
| 23K            | 9.26281                                | 128.5956                              | 54.39915                                      |
| 24G            | 7.63005                                | 107.0329                              | 45.89091                                      |
| 25I            | 8.60224                                | 122.5018                              | 61.59469                                      |
| 26D            | 8.39431                                | 126.7206                              | 52.19548                                      |
| 27L            | 9.04383                                | 123.9081                              | 57.01584                                      |
| 28E            | 8.48357                                | 119.6893                              | 59.0323                                       |
| 29S            | 7.74482                                | 112.6579                              | 58.25966                                      |
| 30K            | 7.72931                                | 116.408                               | 56.86069                                      |
| 31K            | 8.019                                  | 115.4705                              | 53.605                                        |
| 32I            |                                        | <b>B</b>                              |                                               |
| 33T            | 9.17771                                | 126.7206                              | 62.55053                                      |
| 34I            | 9.34                                   | 127.6581                              | 59.977                                        |
| 35H            | 8.95728                                | 128.1269                              | 54.76841                                      |
| 36H            |                                        | <b>B</b>                              |                                               |
| 37D            | 8.328                                  | 119.6893                              | 55.983                                        |
| 38P            |                                        | <b>NA</b>                             |                                               |
| 39I            |                                        |                                       | 59.73818                                      |
| 40A            | 8.92561                                | 131.4081                              | 55.36799                                      |
| 41A            | 8.85796                                | 117.8142                              | 55.26718                                      |
| 42V            | 6.28276                                | 132.8144                              | 59.02288                                      |
| 43N            | 7.73773                                | 118.283                               | 54.55283                                      |
| 44W            | 7.96928                                | 115.0017                              | 51.96832                                      |
| 45P            |                                        |                                       |                                               |
| 46E            | 8.27178                                | 116.8767                              | 56.69308                                      |
| 47M            |                                        | <b>B</b>                              |                                               |
| 48T            | 8.26277                                | 115.4705                              | 62.239                                        |

|     |         |          |          |
|-----|---------|----------|----------|
| 49M | 8.80321 | 126.2518 | 53.69383 |
| 50R |         | B        |          |
| 51F |         | B        |          |
| 52T | 9.181   | 119.2205 | 63.565   |
| 53I | 8.454   | 127.1893 | 61.133   |
| 54T | 9.21194 | 119.6893 | 59.36871 |
| 55P |         |          | 64.31309 |
| 56Q | 7.86762 | 112.6579 | 55.86752 |
| 57T | 7.87334 | 119.6893 | 64.21452 |
| 58K | 8.29194 | 129.0644 | 55.50365 |
| 59M | 8.44682 | 123.9081 | 54.46067 |
| 60S | 7.55086 | 117.3455 | 57.50151 |
| 61E | 8.30971 | 120.158  | 57.44827 |
| 62I | 7.79808 | 122.9705 | 59.05087 |
| 63K | 9.00488 | 122.5018 | 54.12352 |
| 64T | 8.37837 | 115.9392 | 64.96511 |
| 65G | 9.06618 | 115.0017 | 43.80994 |
| 66D | 7.97819 | 121.0955 | 55.59249 |
| 67K | 8.6106  | 122.9705 | 55.75205 |
| 68V | 9.17466 | 115.0017 | 58.52899 |
| 69A | 8.85898 | 122.9705 | 51.08045 |
| 70F | 8.85177 | 119.6893 | 55.50198 |
| 71N | 8.16751 | 116.8767 | 51.75296 |
| 72F | 9.72575 | 121.0955 | 55.98593 |
| 73V | 8.7866  | 115.4705 | 59.41405 |
| 74Q |         | B        |          |
| 75Q |         | B        |          |
| 76G |         | NA       |          |
| 77N |         | NA       |          |
| 78L | 8.1728  | 121.5643 | 54.32381 |
| 79S | 8.48498 | 119.6893 | 57.59637 |
| 80L | 9.61768 | 125.7831 | 54.36187 |
| 81L | 9.3951  | 125.3143 | 55.97789 |
| 82Q | 9.94899 | 127.1893 | 56.79122 |
| 83D | 7.88993 | 115.0017 | 53.45918 |
| 84I | 7.9026  | 115.4705 | 60.52825 |
| 85K | 8.65974 | 124.3768 | 54.55943 |
| 86V | 8.5393  | 121.5643 | 63.07316 |
| 87S | 8.84282 | 122.9705 | 57.39588 |
| 88Q | 8.04068 | 128.1269 | 55.95192 |

NA: Not assigned

B: Broadened beyond detection
